# Supplementary material for: High-throughput robust single-cell DNA methylation profiling with sciMETv2
Source: PubMed Central journal article supplement (PMC9734657; doi:10.1038/s41467-022-35374-3), 2022-12-09
Supplement: 41467_2022_35374_MOESM3_ESM.pdf [file 41467_2022_35374_MOESM3_ESM.pdf]

### **Description of Supporting Information**

**Supplementary Data 1 | sciMET Oligos.** Tables containing the oligonucleotide sequences for the tagmentation and PCR processing steps.

**Supplementary Data 2 | sciMET cell information.** A tab-delimited gzipped text file containing per-cell statistics for each cell.

**Supplementary Data 3 | Cluster-based promoter CG methylation.** Methylation levels for gene promoters for each cluster.

**Supplementary Data 4 | Neuron cluster-based promoter CG methylation.** Methylation levels for gene promoters specifically for neuronal clusters.

**Supplementary Data 5 | Neuron cluster-based gene body CH methylation.** Methylation levels in the CH context for gene bodies specifically for neuronal clusters.
